1

2

3

4

5

## Calibration of individual-based models to epidemiological data:

6

### a systematic review

7

8

9

**C. Marijn Hazelbag<sup>1\*</sup>, Jonathan Dushoff<sup>1,2</sup>, Emanuel M. Dominic<sup>1</sup>, Zinhle E. Mthomboti<sup>1</sup>,**

10

**Wim Delva<sup>1,3,4,5,6,7</sup>**

11

12

<sup>1</sup> The South African Department of Science and Technology-National Research Foundation (DST-

13

NRF) South African Centre for Epidemiological Modelling and Analysis (SACEMA), Stellenbosch

14

University, Stellenbosch, South Africa

15

<sup>2</sup> Department of Mathematics and Statistics, the Institute for Infectious Disease Research,

16

McMaster University, Hamilton, Ontario, Canada

17

<sup>3</sup> School for Data Science and Computational Thinking, Stellenbosch University, Stellenbosch,

18

South Africa

19

<sup>4</sup> Center for Statistics, I-BioStat, Hasselt University, Diepenbeek, Belgium

20

<sup>5</sup> Department of Global Health, Faculty of Medicine and Health, Stellenbosch University,

21

Stellenbosch, South Africa

22

<sup>6</sup> International Centre for Reproductive Health, Ghent University, Ghent, Belgium

23

<sup>7</sup> Rega Institute for Medical Research, KU Leuven, Leuven, Belgium

24

25

\* Corresponding author

26

E-mail: [marijnhazelbag@sun.ac.za](mailto:marijnhazelbag@sun.ac.za)

## 27 **Abstract**

28 Individual-based models (IBMs) informing public health policy should be calibrated to data and  
29 provide estimates of uncertainty. Two main components of model-calibration methods are the  
30 parameter-search strategy and the goodness-of-fit (GOF) measure; many options exist for each  
31 of these. This review provides an overview of calibration methods used in IBMs modelling  
32 infectious disease spread.

33

34 We identified articles on PubMed employing simulation-based methods to calibrate IBMs  
35 informing public health policy in HIV, tuberculosis, and malaria epidemiology published  
36 between 1 January 2013 and 31 December 2018. Articles were included if models stored  
37 individual-specific information, and calibration involved comparing model output to population-  
38 level targets. We extracted information on parameter-search strategies, GOF measures, and  
39 model validation.

40

41 The PubMed search identified 653 candidate articles, of which 84 met the review criteria. Of the  
42 included articles, 40 (48%) combined a quantitative GOF measure with an algorithmic  
43 parameter-search strategy – either an optimisation algorithm (14/40) or a sampling algorithm  
44 (26/40). These 40 articles varied widely in their choices of parameter-search strategies and GOF  
45 measures. For the remaining 44 (52%) articles, the parameter-search strategy could either not  
46 be identified (32/44) or was described as an informal, non-reproducible method (12/44). Of  
47 these 44 articles, the majority (25/44) were unclear about the GOF measure used; of the rest,  
48 only five quantitatively evaluated GOF. Only a minority of the included articles, 14 (17%)  
49 provided a rationale for their choice of model-calibration method. Model validation was  
50 reported in 31 (37%) articles.

51

52 Reporting on calibration methods is far from optimal in epidemiological modelling studies of  
53 HIV, malaria and TB transmission dynamics. The adoption of better documented, algorithmic

54 calibration methods could improve both reproducibility and the quality of inference in model-  
55 based epidemiology. There is a need for research comparing the performance of calibration  
56 methods to inform decisions about the parameter-search strategies and GOF measures.

57

## 58 **Author summary**

59 Calibration - that is, “fitting” the model to data - is a crucial part of using mathematical models to  
60 better forecast and control the population-level spread of infectious diseases. Evidence that the  
61 mathematical model is well-calibrated improves confidence that the model provides a realistic  
62 picture of the consequences of health policy decisions. To make informed decisions,  
63 Policymakers need information about uncertainty: i.e., what is the range of likely outcomes  
64 (rather than just a single prediction). Thus, modellers should also strive to provide accurate  
65 measurements of uncertainty, both for their model parameters and for their predictions. This  
66 systematic review provides an overview of the methods used to calibrate individual-based  
67 models (IBMs) of the spread of HIV, malaria, and tuberculosis. We found that less than half of the  
68 reviewed articles used reproducible, non-subjective calibration methods. For the remaining  
69 articles, the method could either not be identified or was described as an informal, non-  
70 reproducible method. Only one-third of the articles obtained estimates of parameter  
71 uncertainty. We conclude that the adoption of better-documented, algorithmic calibration  
72 methods could improve both reproducibility and the quality of inference in model-based  
73 epidemiology.

74

75

76

77

78

## 79 Introduction

80 Individual-based models (IBMs) intended to inform public health policy should be  
81 calibrated to real-world data and provide valid estimates of uncertainty [1], [2]. IBMs track  
82 information for a simulated collection of interacting individuals [3]. IBMs allow for more  
83 detailed incorporation of heterogeneity, spatial structure, and individual-level adaptation (e.g.  
84 physiological or behavioural changes) compared to other modelling frameworks [4]. This  
85 complexity makes IBMs valuable planning tools, particularly in settings where real-world  
86 intricacies that are not accounted for in simpler models have important effects [5], [6]. However,  
87 researchers and policymakers often battle with the question of how much value they can attach  
88 to the results of IBMs [7]. Fitting an IBM to empirical data (calibration) improves confidence that  
89 the simulation model provides a realistic and accurate estimate of the outcome of health policy  
90 decisions (e.g. projection of the disease prevalence under different intervention strategies, or the  
91 cost-effectiveness of different intervention strategies) [8]–[12]. Transparent reporting on  
92 calibration methods for IBMs is therefore required [11], [12].

93

94 Parameter values with accompanying confidence intervals used in IBMs are obtained from the  
95 literature and are often obtained through statistical estimation. When researchers cannot  
96 estimate parameters from empirical data, they obtain their likely values through calibration  
97 [12]. Parameter calibration is often difficult for IBMs because their greater complexity can  
98 render the likelihood function analytically intractable (i.e. it is impossible to write down the  
99 likelihood function in closed form) or prevent explicit numerical calculation of the likelihood  
100 function [13]–[15]. Consequently, simulation-based calibration methods that avoid the use of a  
101 likelihood function in closed form have been developed [16]. These methods run the model for  
102 different parameter sets to identify parameter sets producing model output that best resembles  
103 the summary statistics obtained from the empirical data (e.g. disease prevalence over time).  
104 Formal simulation-based calibration requires *summary statistics (targets)* from empirical data, a  
105 *parameter-search strategy* for exploring the parameter space, a *goodness-of-fit (GOF)* measure to

106 evaluate the concordance between model output and targets, *acceptance criteria* to determine  
107 which parameter sets produce model output close enough to the targets, and a *stopping rule* to  
108 determine when the calibration ends [9][17]. IBMs vary in their complexity (i.e. the number of  
109 parameters) and the amount of data available for calibration and validation [10]. Simulation-  
110 based calibration of IBMs of higher complexity is typically more computationally intensive [18],  
111 [19].

112

113 In this review, we pay particular attention to the parameter-search strategy and GOF  
114 measure used. Algorithmic parameter-search strategies can be divided into *optimisation*  
115 *algorithms* and *sampling algorithms* [14], S2 table describes commonly used algorithms.  
116 Optimisation algorithms find the parameter combination that optimises the GOF, resulting in a  
117 single best parameter combination. Examples include grid-search and iterative, descent-guided  
118 optimisation algorithms using simplex-based or direct search methods (e.g. the Nelder-Mead  
119 method) [20], but many different algorithms exist [21]. Optimisation algorithms provide only  
120 point estimates of parameters; once these are found, another algorithm may be used to obtain  
121 confidence intervals (e.g. the profile likelihood method, Fisher information, etc.) [22], [23].  
122 Sampling algorithms aim to find a distribution of parameter values that approximate the  
123 likelihood surface or posterior distribution. Examples include approximate Bayesian  
124 computation (ABC) methods and sampling importance resampling [8], [13], [14], [24], [25].  
125 Parameter distributions obtained from sampling algorithms allow for the representation of  
126 correlations between parameters and for parameter uncertainty to be incorporated into model  
127 projections [2], [6], [8], [17], [26]. Quantitative measures of GOF include distance measures (e.g.  
128 relative distance, squared distance) and measures based on a surrogate likelihood function: the  
129 likelihood of observing the target statistic under the assumption that the model output is a  
130 random draw from a presumed distribution (e.g. binomial for prevalence statistics). As the  
131 model output is not necessarily distributed as presumed, we refer to this likelihood as the  
132 “surrogate” likelihood. A more subjective method of calibration involves the manual adjustment

133 of parameter values, followed by a visual assessment of whether the model outputs resemble  
134 empirical data [27].

135

136 Previous research in the context of IBMs of HIV transmission found that 22 (69%) out of  
137 32 included articles described the process through which the model was calibrated to data [12].  
138 The impact of stochasticity on the model results, defined as the random variation in model  
139 output induced by running the model multiple times using the same parameter value with a  
140 different random seed, was summarised in nearly half (15/32) of the articles [12]. The depth of  
141 reporting on calibration methods was highly variable [9], [12]. A systematic review in the  
142 context of population-level health policy models, including 37 articles, found that 25(71%) of  
143 these performed model calibration [28]. About half (12/25) of these articles reported on the  
144 calibration methods used, whereas the other half (13/25) used informal methods for parameter  
145 calibration or did not report on the calibration methods [28]. Previous research on calibration  
146 methods in cancer-simulation models in general – not IBMs specifically – found that 131 (85%)  
147 out of 154 included articles may have calibrated at least one unknown parameter. Of the 131  
148 articles that calibrated parameters, the majority (84/131) did not describe the use of a GOF  
149 measure, the rest either used a quantitative GOF (27/131) such as the likelihood or distance  
150 measures or used visual assessment of GOF (20/131) [9]. Only a few articles reported parameter  
151 distributions resulting from calibration; most only presented a single best parameter  
152 combination [9]. Information on the parameter-search strategy and stopping rules was generally  
153 not well described, and acceptance criteria were rarely mentioned [9], [29]. Of the 154 articles  
154 included in the review by Stout *et al.*, 80 (52%) mentioned model validation [9]. However, while  
155 previous studies have reviewed specific portions of the modelling literature, they either did not  
156 focus on IBMs or did not focus on the calibration methods in much detail.

157

158 We conducted a systematic review of epidemiological studies using IBMs of the HIV,  
159 malaria and tuberculosis (TB) epidemics, as these have been among the most investigated

160 epidemics with the highest global burden of disease [30]. We aim to provide an overview of  
161 current practices in the simulation-based calibration of IBMs.  
162

## 163 Results

### 164 Selection of articles for inclusion

165 The PubMed search resulted in 653 publications, of which 84 articles were included for  
166 review; 388 were excluded based on title and abstract, and another 181 were excluded based on  
167 a full-text review (see Fig 1). The number of articles selected by publication year increased from  
168 seven in 2013 to 20 in 2018.  
169

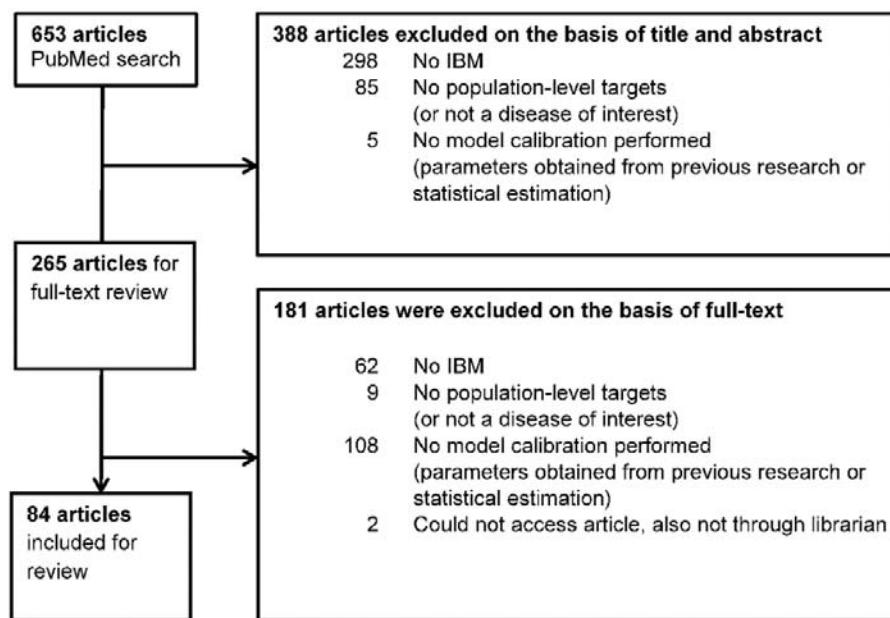

170

171 **Fig 1. PRISMA flow diagram detailing the selection process of articles included in the**  
172 **review.**

173

### 174 Scope and objectives of included articles

175 S1 Table summarises the characteristics of the included articles. Fifty-eight (69%) of the  
176 included articles presented IBMs in HIV research, 16 (19%) concerned malaria, and another 10  
177 (12%) concerned tuberculosis.

178

179 Most articles, namely 56 (67%), investigated the effect of an intervention, 17 articles  
180 looked at behavioural or biological explanations for the observed epidemic, and other goals (e.g.  
181 parameter estimation, model development) were used in 17. In total, six (7%) articles had two  
182 objectives. For most of these (5/6), one of the objectives was investigating the effect of an  
183 intervention (see S1 Table).

184

### 185 **Parameter-search strategies and measures of GOF**

186 Of the included articles, 40 (48%) combined a quantitative measure of GOF with an  
187 algorithmic parameter-search strategy, which was an optimisation algorithm (14/40) or a  
188 sampling algorithm (26/40) (see Fig 2). For the remaining 44 (52%) articles, the parameter-  
189 search strategy could either not be identified (32/44) or was described as an informal, non-  
190 reproducible method (12/44). Tables A, B and C in S1 appendix show that there is no convincing  
191 evidence that the parameter search strategy changed with publication year or differed by  
192 disease studied. A brief description of the methods referred to in Fig 2 under optimisation  
193 algorithm and sampling algorithm is provided in S2 Table.



194

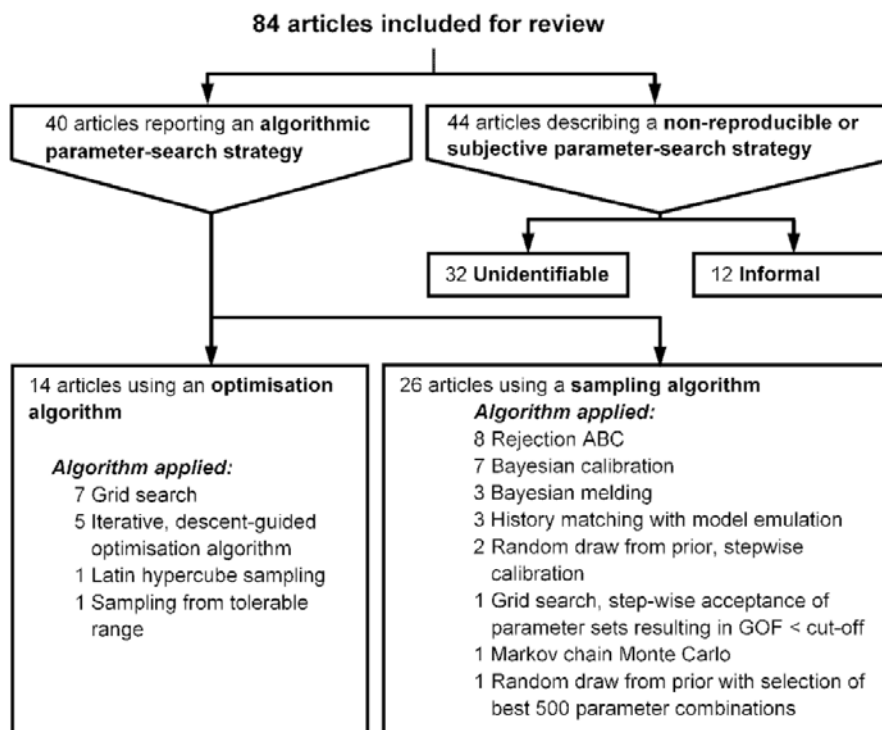

195

196 **Fig 2. Reporting and application of parameter search strategies in epidemiological**  
197 **studies.**

198

199 Detailed information on calibration methods for the 14 (17%) articles using optimisation  
200 algorithms is reported in Table 1. For the parameter-search strategy, most articles used either a  
201 grid search (7/14), Latin square (1/14) or random draw from tolerable range (1/14), followed  
202 by the selection of the single best parameter combination. Several iterative, descent-guided  
203 optimisation algorithms (i.e. Nelder-Mead, interior-point algorithm, coordinate descent with  
204 golden section search, random search mechanism) were used in the remaining articles (5/14).  
205 Of these five articles, most (4/5) accepted a single best parameter combination without  
206 confidence intervals, while the remaining article obtained confidence intervals around  
207 parameter estimates (see S1 Text.). For the GOF measure, the most common choice was a  
208 squared distance (6/14). Various GOF measures were used in the remaining articles; these  
209 include absolute distances (2/14) and R-squared (2/14).

210

211 **Table 1. Details of the calibration methods used in articles using optimisation algorithms**  
 212 **for calibration, sorted by parameter search strategy algorithm.**

| Authors                       | Year | Pathogen | Parameter search strategy algorithm                                                                     | GOF                                                                        |
|-------------------------------|------|----------|---------------------------------------------------------------------------------------------------------|----------------------------------------------------------------------------|
| Luo <i>et al.</i>             | 2018 | HIV      | Grid search                                                                                             | Absolute distance                                                          |
| Romero-Severson <i>et al.</i> | 2013 | HIV      | Grid search                                                                                             | Kolmogorov-Smirnov                                                         |
| Marshall <i>et al.</i>        | 2018 | HIV      | Grid search                                                                                             | R-squared                                                                  |
| Goedel <i>et al.</i>          | 2018 | HIV      | Grid search                                                                                             | R-squared and Manhattan distance of parameters                             |
| Brookmeyer <i>et al.</i>      | 2014 | HIV      | Grid search                                                                                             | Squared distance                                                           |
| Suen <i>et al.</i>            | 2014 | TB       | Grid search                                                                                             | Number of model outputs within the confidence intervals around the targets |
| Suen <i>et al.</i>            | 2015 | TB       | Grid search                                                                                             | Number of model outputs within the confidence intervals around the targets |
| Bershteyn <i>et al.</i>       | 2013 | HIV      | Iterative, descent-guided optimisation algorithm ( <i>Coordinate descent w. golden section search</i> ) | Squared distance                                                           |
| Klein <i>et al.</i>           | 2015 | HIV      | Iterative, descent-guided optimisation algorithm ( <i>Coordinate descent w. golden section search</i> ) | Squared distance                                                           |
| Sauboin <i>et al.</i>         | 2015 | Malaria  | Iterative, descent-guided optimisation algorithm ( <i>Interior point algorithm, hill-climbing</i> )     | Squared distance                                                           |
| Knight <i>et al.</i>          | 2015 | TB, HIV  | Iterative, descent-guided optimisation algorithm ( <i>Nelder-Mead</i> )                                 | Squared distance                                                           |
| Kasaie <i>et al.</i>          | 2018 | HIV      | Iterative, descent-guided optimisation algorithm ( <i>Random search mechanism</i> )                     | Absolute distance                                                          |
| Shrestha <i>et al.</i>        | 2017 | TB       | Latin hypercube sampling                                                                                | Surrogate likelihood                                                       |
| Jewell <i>et al.</i>          | 2015 | HIV      | Sampling from tolerable range                                                                           | Squared distance                                                           |

213

214 Table 2 contains the details of the calibration methods in the 26 (31%) articles using  
 215 sampling algorithms. Random sampling from the prior, followed by rejection ABC, was used the  
 216 most (8/26). Different types of Bayesian calibration (7/26), Bayesian melding (3/26) and  
 217 history matching with model emulation (3/26) were also used. Most articles (10/26) used the  
 218 surrogate likelihood as a measure of GOF, and Various GOF measures were used in the

219 remaining articles, these include absolute distances (4/26), relative distances (4/26) and  
 220 squared distances (4/26). (see Table 2).

221

222 **Table 2. Details of the calibration methods in articles using sampling algorithms for**  
 223 **calibration, sorted by parameter search strategy algorithm.**

| Authors                     | Year | Pathogen | Parameter search strategy algorithm                                            | GOF                    |
|-----------------------------|------|----------|--------------------------------------------------------------------------------|------------------------|
| <i>Cameron et al.</i>       | 2015 | Malaria  | Bayesian calibration ( <i>Combining model emulation with MCMC</i> )            | Surrogate likelihood   |
| <i>Huynh et al.</i>         | 2015 | TB       | Bayesian calibration ( <i>Latin hypercube with IMIS</i> )                      | Surrogate likelihood   |
| <i>Chang et al.</i>         | 2018 | TB       | Bayesian calibration ( <i>Latin hypercube with IMIS</i> )                      | Surrogate likelihood   |
| <i>Penny et al.</i>         | 2015 | Malaria  | Bayesian calibration ( <i>MCMC</i> )                                           | Surrogate likelihood   |
| <i>Penny et al.</i>         | 2015 | Malaria  | Bayesian calibration ( <i>MCMC</i> )                                           | Surrogate likelihood   |
| <i>White et al.</i>         | 2018 | Malaria  | Bayesian calibration ( <i>MCMC</i> )                                           | Surrogate likelihood   |
| <i>Schalkwyk et al.</i>     | 2018 | HIV      | Bayesian calibration ( <i>Random draw from prior with SIR</i> )                | Surrogate likelihood   |
| <i>Abuelezam et al.</i>     | 2016 | HIV      | Bayesian melding                                                               | Squared distance       |
| <i>McCormick et al.</i>     | 2014 | HIV      | Bayesian melding                                                               | Surrogate likelihood   |
| <i>McCormick et al.</i>     | 2017 | HIV      | Bayesian melding                                                               | Surrogate likelihood   |
| <i>Ciaranello et al.</i>    | 2013 | HIV      | Grid search, step-wise acceptance of parameter sets resulting in GOF < cut-off | Absolute distance      |
| <i>McCreesh et al.</i>      | 2017 | HIV      | History matching with model emulation                                          | Implausibility measure |
| <i>McCreesh et al.</i>      | 2017 | HIV      | History matching with model emulation                                          | Implausibility measure |
| <i>McCreesh et al.</i>      | 2018 | HIV      | History matching with model emulation                                          | Implausibility measure |
| <i>Shcherbacheva et al.</i> | 2018 | Malaria  | Markov chain Monte Carlo                                                       | Absolute distance      |
| <i>Johnson et al.</i>       | 2016 | HIV      | Random draw from prior with selection of best 500 parameter combinations       | Surrogate likelihood   |
| <i>Pizzitutti et al.</i>    | 2015 | Malaria  | Random draw from prior, stepwise calibration                                   | Absolute distance      |
| <i>Pizzitutti et al.</i>    | 2018 | Malaria  | Random draw from prior, stepwise calibration                                   | Squared distance       |
| <i>Nakagawa et al.</i>      | 2016 | HIV      | Rejection ABC ( <i>Random draw from prior</i> )                                | Relative distance      |
| <i>Nakagawa et al.</i>      | 2017 | HIV      | Rejection ABC ( <i>Random draw from prior</i> )                                | Chi-square             |
| <i>Cambiano et al.</i>      | 2018 | HIV      | Rejection ABC ( <i>Random draw from prior</i> )                                | Relative distance      |
| <i>Hontelez et al.</i>      | 2013 | HIV      | Rejection ABC ( <i>Random draw from prior</i> )                                | Squared distance       |
| <i>Phillips et al.</i>      | 2013 | HIV      | Rejection ABC ( <i>Random draw from prior</i> )                                | Relative distance      |
| <i>Phillips et al.</i>      | 2015 | HIV      | Rejection ABC ( <i>Random draw from prior</i> )                                | Relative distance      |
| <i>Shrestha et al.</i>      | 2017 | HIV      | Rejection ABC ( <i>Random draw from prior</i> )                                | Absolute distance      |
| <i>Tuite et al.</i>         | 2017 | TB       | Rejection ABC ( <i>Random draw from prior</i> )                                | Squared distance       |

224 IMIS, Incremental-mixture importance sampling; SIR, Sampling importance resampling; MCMC, Markov chain Monte  
225 Carlo.

226

227 From the 44 (52%) articles with unidentifiable or informal parameter-search strategies,  
228 the majority (25/44) are also unclear about the GOF used, while the rest either relied on visual  
229 inspection as a GOF (14/44) or used a quantitative GOF (5/44).

230

231 Only 14 (17%) of the 84 included articles provided a rationale for their choice of model-  
232 calibration method. For example, McCreesh *et al.* [31] reported: “The model was fitted to the  
233 empirical data using history matching with model emulation, which allowed uncertainties in  
234 model inputs and outputs to be fully represented, and allowed realistic estimates of uncertainty  
235 in model results to be obtained” (see S2 Text. for more examples). Other examples indicate that  
236 an algorithmic calibration method failed to provide either a good fit or parameter estimates:  
237 “Ultimately, we chose to use visual inspection because the survival curves did not fit closely  
238 enough using the other two more quantitative approaches.” [32] Or “[Calibration] was unable to  
239 resolve co-varying parameters. These parameters were adjusted by hand...” [33].

240 Ten out of the 84 articles included (12%) used a weighted calculation of GOF. Four  
241 articles weighted the GOF based on the amount of data behind the summary statistic fitted to, for  
242 example by weighting based on the inverse of the width of the confidence interval around the  
243 data. In contrast, one article increased the weight for a data source for which fewer data was  
244 available. Other strategies included weighting based on a subjective assessment of the quality of  
245 the data, or weighting based on which data they wanted the model to fit best. One article down-  
246 weighted particular data to improve fit. Others stressed the importance of determining weights  
247 a priori since weights are chosen subjectively.

248

### 249 **Acceptance criteria and stopping rules**

250 None (0/14) of the articles applying optimisation algorithms mentioned the acceptance  
251 criteria or stopping rules. Acceptance criteria and stopping rules applied in studies using

252 sampling algorithms can be summarised as running the model until obtaining an arbitrary  
253 number of accepted parameter combinations.

254

### 255 **The number of target statistics, the number of calibrated parameters and the size** 256 **of the simulated population**

257 The number of target statistics was explicitly mentioned in only three (4%) of the 84  
258 included articles, for 62 (74%) articles we had enough information to attempt to deduce this  
259 number from either text or figures. The remaining 19 (23%) articles either provided incomplete  
260 information (11/19) or no information (8/19). Some (4/65) of the articles for which we were  
261 able to obtain the number of target statistics had different numbers of target statistics for  
262 calibration in different locations or calibration to different diseases. The 61 (73%) articles for  
263 which we were able to obtain a single count had a median number of target statistics of 23  
264 (range 1 – 321). A histogram of the number of target statistics is provided in figure A in S2  
265 Appendix. The number of target statistics differed between parameter search strategies (See Fig  
266 3B, Kruskal-Wallis chi-square = 8.610,  $p = 0.035$ ), with articles using sampling strategies having  
267 more target statistics compared to articles for which we could not identify the parameter search  
268 strategy (Wilcoxon rank-sum, Benjamini-Hochberg adjusted p-value = 0.025).

269 The number of calibrated parameters was explicitly mentioned in 11 (13%) of the 84  
270 included articles, for another 53 (63%) articles it was possible to deduce this number from  
271 either text or figures. The remaining 20 (24%) articles either provided incomplete information  
272 (10/20) or no information at all (10/20). The 64 (75%) articles for which we were able to obtain  
273 a count had a median number of calibrated parameters of 10 (range 1 – 96). A histogram of the  
274 number of calibrated parameters is provided in figure B in S2 Appendix. The number of  
275 calibrated parameters differed between parameters search strategies (See Fig 3A, Kruskal-  
276 Wallis chi-square = 9.304,  $p = 0.026$ ), with articles using sampling strategies having higher  
277 numbers of calibrated parameters compared to articles for which we could not identify the  
278 parameter search strategy (Wilcoxon rank-sum, Benjamini-Hochberg adjusted p-value = 0.050).

279

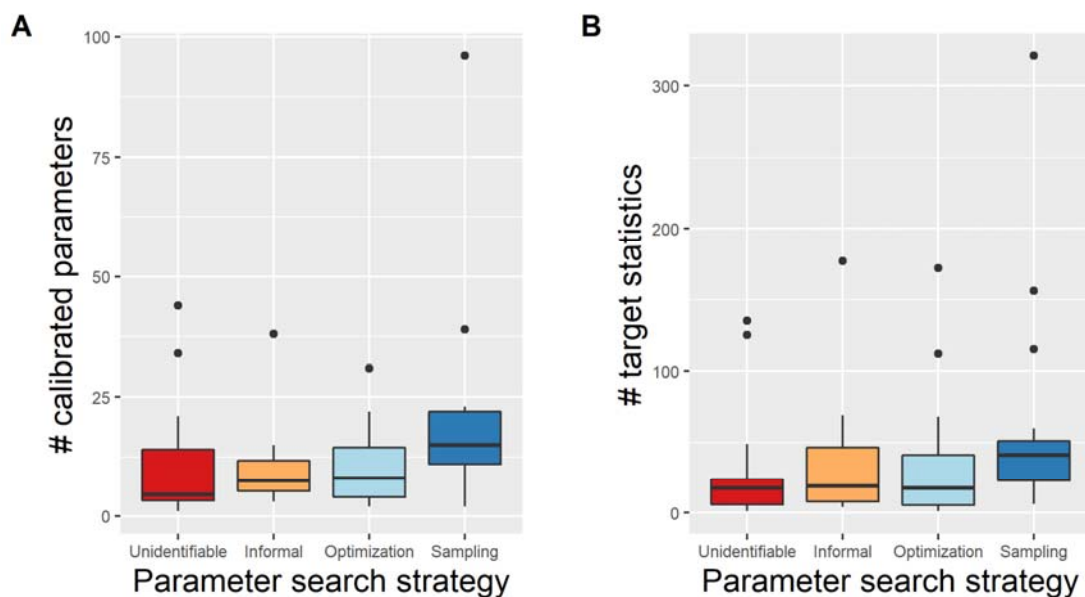

280

281 **Fig 3. Comparison of the number of calibrated parameters and target statistics between**  
282 **different parameter search strategies.**

283 (A) Boxplots of the number of calibrated parameters for different parameter search strategies.

284 (B) Boxplots of the number of target statistics for different parameter search strategies.

285

286 For 55 (66%) articles, we obtained counts for both the number of target statistics and  
287 the number of calibrated parameters. For many of these articles (17/55), the number of  
288 calibrated parameters appeared to exceed the number of target statistics. A plot of the number  
289 of target statistics against the number of calibrated parameters is provided in figure C in S2  
290 Appendix.

291 The size of the simulated population was explicitly mentioned in 54 (64%) of the 84  
292 included articles, for another 9 (11%) articles it was possible to deduce this number from either  
293 text or figures. The remaining 21 (25%) articles either provided incomplete information (3/21)  
294 or no information at all (18/21). For the 63 (75%) articles for which we obtained a number, the  
295 median population size was 78000 (range: 250 - 47000000). A histogram of the  $\log_{10}$  of the size  
296 of the simulated population is provided in figure D in S2 Appendix.

297

## 298 **Computational aspects and the use of platforms**

299 The software used to build IBM was not reported in 33 (39%) of the articles. Sixteen  
300 articles (19%) used the low-level programming language C++, six (7%) used MATLAB, and  
301 another six (7%) used Python. Various other computing platforms were used in the remaining  
302 23 (28%) articles. A high-performance computing facility was used in 16 (19%) articles.

303

304 Several simulation tools (i.e. CEPAC [34], EMOD [35] HIV-CDM [36], MicroCOSM [37],  
305 PATH [38], STDSIM [39] and TITAN [40]) were used in the articles modelling HIV. Similarly, two  
306 platforms (i.e. EMOD [41] and OpenMalaria [42]) were used in the articles modelling malaria. In  
307 the articles modelling tuberculosis, the only tool reported was EMOD [43].

308

### 309 **Model validation**

310 Only 31 (37%) articles mentioned that a validation of the model had been performed.

311

## 312 **Discussion**

313 More than half of IBMs we studied used non-reproducible or subjective calibration methods.  
314 Articles that reported the use of formal calibration methods used a wide range of parameter-  
315 search strategies and GOF measures. Only one-third of articles used calibration methods that  
316 quantify parameter uncertainty. These findings are important because choices concerning the  
317 calibration method can have substantial effects on model results and policy implications [2],  
318 [6]–[8], [44]–[46].

319

320 We encourage authors to use the standardised Calibration Reporting Checklist of Stout *et*  
321 *al.* [9]. Additionally, we propose an extended checklist in S3 appendix based on the work  
322 presented in this paper. While algorithmic parameter-search strategies are in principle  
323 reproducible, unclear or incomplete reporting, and non-disclosure of software code can render  
324 them de facto non-reproducible. [47]. Manual adjustment of parameter values and visual

325 inspection of GOF may perform equally well compared to other methods in terms of GOF alone  
326 [48], may provide researchers with valuable insights into and familiarity with the model [49],  
327 and can be useful for purely didactic purposes [50]–[52]. However, we advise against using  
328 these methods in analyses intended to inform public health as they do not favour reproducibility  
329 and involve subjective judgment, which may produce less than optimal calibration results and  
330 usually leads to the acceptance of a single parameter set (i.e. does not provide parameter  
331 uncertainty) [17]. On occasion, authors justified their choice of an informal method by indicating  
332 that algorithmic calibration methods did not converge to provide parameter estimates, or failed  
333 to provide a satisfactory fit to the targets. A potential explanation for non-convergence of an  
334 algorithmic calibration method is that the parameters in question are unidentifiable, which is  
335 the case when a vast array of different parameter combinations provide a comparably good fit to  
336 the target statistics. Performing manual calibration in such an instance will deliver one set of  
337 parameters out of all of the parameter combinations that provide a fit. However, using this single  
338 parameter combination hides the fact that there is not enough information to uniquely identify  
339 the best parameter values. Furthermore, model-stochasticity provides the possibility that a great  
340 fit is found by chance for a parameter combination for which the probability of observing the  
341 target statistics is lower than for other parameter combinations.

342

343 There are several methodological challenges in the calibration of individual-based  
344 models, including the choice of calibration method – i.e. the combination of algorithmic  
345 parameter-search strategy and GOF measure. The findings of the current review and previous  
346 research suggest that there is no consensus on which calibration method to use [9], [10], [17],  
347 [53], [54]. Additionally, some of the articles reviewed here indicated that algorithmic calibration  
348 methods had failed, leading the researchers to calibrate the model, either fully or partially, by  
349 hand. These issues suggest that there is a need for research comparing the performance of  
350 calibration methods to inform the choice of parameter-search strategy and GOF [10]. Previous  
351 research on calibration methods focused on the GOF [27], computation time and analyst time  
352 [48]. Where applicable, correct estimation of the posterior [55] should be a core aspect of



353 performance. We further suggest investigating several contextual variables, including the  
354 amount and nature of the empirical data to calibrate against, the number and type of model  
355 parameters to be calibrated and insights to be derived from the calibrated model. As evident  
356 from our review, these contextual variables vary widely across IBM studies in epidemiology.

357

358 Another methodological challenge in the calibration of IBMs is determining a priori  
359 whether the target statistics provide sufficient information to calibrate the parameters [56],  
360 especially when the model has many parameters [57]. Firstly, the target statistics are based on  
361 variable amounts of raw data. Secondly, a time series of target statistics is often used, typically  
362 violating the assumption of independence implied by many calibration methods. Thirdly, the  
363 complexity of the model may hamper an appropriate specification of a prior parameter-  
364 distribution (including the specification of a correlation between parameters) that is fully  
365 informed by prior knowledge of the data-generating processes represented by the model. These  
366 problems preclude the use of standard statistical methods for calculating the number of target  
367 statistics that is sufficient for parameter calibration. A related problem is that target summary  
368 statistics are based on data from different sources, including observational data that are  
369 potentially affected by treatment-confounder feedback (e.g. time-dependent confounder CD4  
370 cell count affected by prior cART treatment) [58]. Another related problem is that of validation,  
371 i.e. testing model performance on data that was not included in the calibration step. There is  
372 considerable debate on when data should be reserved for this purpose [54].

373

374 The last methodological aspect of IBMs we would like to draw attention to is the size of  
375 the simulated population [1], [59]. Intuitively, one would recommend that the simulated  
376 population size should be similar to the size of the population from which the samples were  
377 drawn that gave rise to the target statistics. However, for many studies, modelling the full  
378 population is not feasible with currently available computational infrastructure. Instead,  
379 researchers often adjust for the inflated stochasticity in the modelled system by averaging  
380 outcomes of interest over multiple simulations runs per parameter set [59]. How choices around

381 modelled population size and analysis of model output affect the validity of model inference  
382 deserves further attention in future research.

383

384 Our results in the setting of HIV, TB and malaria IBMs indicate that the use of formal  
385 calibration methods (48% of articles) is higher than in previous research on simulation models  
386 in general – not IBMs specifically. Previously, only one-fifth to one-third of articles reporting on  
387 epidemiological models used a quantitative GOF [9], [60]. Our results concerning parameter  
388 uncertainty are also optimistic compared to previous research by Stout *et al.* on calibration  
389 methods in cancer models, which found that almost no articles quantified parameter  
390 uncertainty, but instead accepted a single best-fitting parameter set as the result of the  
391 calibration [9]. The same researchers reported that several different combinations of parameter-  
392 search strategies and GOFs were used [9], outcomes which are similar to our findings. Stout *et al.*  
393 report that articles rarely describe acceptance criteria and stopping rules. Stout *et al.* also report  
394 that a standard description of the calibration process lacks in almost all articles [9]. Similarly,  
395 previous research on IBMs of HIV transmission found that reporting was lacking in the  
396 description of calibration methods [12]. All of this is in agreement with the results of the current  
397 review. Concerning the goals of the included articles, our results broadly agree with  
398 Punyacharoensin *et al.* They found that the main goals of HIV transmission models for the study  
399 of men who have sex with men are: making projections for the epidemic, investigating how the  
400 incorporation of various assumptions around the behavioural or biological characteristics affect  
401 these projections, and evaluating the impact of interventions [60].

402

403 To our knowledge, this is the first detailed review of methods used to calibrate IBMs of  
404 HIV, malaria and TB epidemics. A limitation of our study is that we are unsure to what extent the  
405 results are generalisable to other infectious diseases. We encourage future research on other  
406 diseases to confirm or refute our current findings on the use of and reporting on methods in the  
407 calibration of IBMs in epidemiological research. Similarly, since our PubMed search excluded  
408 articles matching “molecular”, we may have missed relevant articles. However, we don’t believe

409 this selection is likely to bias the findings of this review. Another possible concern is that we  
410 don't control for overlaps in authorship; thus, we effectively treat articles that come from a given  
411 "research group" as independent observations, even though the calibration method used by a  
412 particular group is often the same, as we show in Tables 1 and 2. Another limitation is that the  
413 counts presented in this review often had to be deduced from the article, this was a difficult and  
414 laborious task involving manual counting of target statistics in either the text, figures or tables, a  
415 process that is prone to error. A final limitation is that we did not go into the strengths and  
416 weaknesses of each method. Existing literature compares the performance of alternative  
417 algorithms for calibrating the same model but does not allow us to draw general conclusions  
418 [10]. As a starting point for comparison, we provide a brief description of calibration methods in  
419 S2 Table.

420

421 In conclusion, it appears that calibrating individual-based models in epidemiological studies of  
422 HIV, malaria and TB transmission dynamics remains more of an art than a science. Besides  
423 limited reproducibility for a majority of the modelling studies in our review, our findings raise  
424 concerns over the correctness of model inference (e.g., estimated impact of past or future  
425 interventions) for models that are poorly calibrated. The quality of inference and reproducibility  
426 in model-based epidemiology could benefit from the adoption of algorithmic parameter-search  
427 strategies and better-documented calibration and validation methods. We recommend the use of  
428 sampling algorithms to obtain valid estimates of parameter uncertainty and correlations  
429 between parameters. There is a need for simulation-based studies that compare the  
430 performance, strengths and limitations of different methods for calibrating IBMs to  
431 epidemiological data.

432

## 433 **Materials and methods**

434 This review was performed following the Preferred Reporting Items for Systematic  
435 Reviews and Meta-Analyses (PRISMA) statement [61]. The PRISMA flow diagram details the  
436 selection process of articles included for review (see Fig 1).

437

### 438 **Search strategy and selection criteria**

439 We identified articles on PubMed that employed simulation-based methods to calibrate  
440 IBMs of HIV, malaria and tuberculosis, and that were published between 1 January 2013 and 31  
441 December 2018. Six years seemed to be long enough to yield a sizeable amount of information  
442 and to observe recent time trends, and short enough to be feasible and to speak to recent  
443 practices in model calibration in epidemiological modelling studies. The following search query  
444 was performed on 31 January 2019: *'((HIV[tiab] OR malaria[tiab] OR tuberculo\*[tiab] OR  
445 TB[tiab]) AND (infect\* OR transmi\* OR prevent\*) AND (computer simulation[tiab] OR  
446 microsimulation[tiab] OR simulation[tiab] OR agent-based[tiab] OR individual-based[tiab] OR  
447 computer model\*[tiab] OR computerized model\*[tiab]) AND ("2013/01/01"[Date - publication] :  
448 "2018/12/31"[Date - publication]) NOT(molecular))'*.

449

450 Eligibility criteria were agreed upon by WD, JD and CMH before screening. Articles were  
451 included if models stored individual-specific information and calibration involved running the  
452 model and comparing model output to population-level targets expressed as summary statistics.  
453 We excluded review articles, statistical simulation studies, and studies that focused on molecular  
454 biology and immunology because we were primarily interested in studies informing public  
455 health policy.

456

457 Titles and abstracts were screened for eligibility by CMH, and difficult cases were  
458 discussed with WD. If the title and abstract did not provide sufficient information for exclusion, a

459 full-text examination was performed. Full-text inclusion was performed by two independent  
460 researchers (CMH and either ZM or ED) for a subset of 100 articles. CMH included 28 articles, of  
461 which ZM and ED did not include six; these six articles were double-checked by WD and  
462 consequently included for review. ZM included four articles that CMH did not include; these four  
463 articles were double-checked by WD and consequently not included for review. After that, full-  
464 text inclusion was performed by CMH in consultation with WD.

465

## 466 **Data extraction**

467 For each article, we extracted information on the objective of the study (i.e. estimating  
468 the effect of an intervention, investigating a behavioural or biological explanation for the  
469 observed infectious disease outbreak or other goals including estimation of parameters or  
470 model development), the parameter-search strategy and the GOF measure, the rationale for  
471 choosing this calibration strategy over alternatives, and model validation. Acceptance criteria  
472 and stopping rules are only relevant for articles applying algorithmic parameter-search  
473 strategies and collected for that subset of articles. For readability purposes, we say “used” to  
474 mean “reported the use of” throughout this review.

475

476 Information was collected independently by two reviewers (CMH and either ZM or ED)  
477 for each article included using a prospectively developed form. This form was based on the  
478 Calibration Reporting Checklist of Stout *et al.* [9] and was extended by several items, including;  
479 the software and hardware used to build the model, the size of the initial population of agents  
480 and the name of the modelling platform. Additionally, we inserted several items to collect  
481 information on the number of calibrated parameters, the number of fixed parameters, and the  
482 number of targets. We noted how information on these counts was reported in the articles (i.e.  
483 the number was explicitly provided, could be deduced from text or figures, was provided  
484 incompletely or was not provided).

485

486 Information on calibration methods was extracted verbatim, allowing for later  
487 classification. Articles on which there was disagreement in the classification were discussed by  
488 WD, JD and CMH until an agreement was reached. We classified articles reporting both  
489 algorithmic and informal calibration as informal since doing part of the calibration informally  
490 makes the entire calibration irreproducible.

491

## 492 **Statistical analysis**

493 R 3.5.0 ([www.r-project.org](http://www.r-project.org)) was used to perform the statistical analyses [62]. Differences  
494 between groups in non-normally distributed continuous variables were analysed by the  
495 nonparametric Kruskal-Wallis test [63]. Wilcoxon rank-sum test was used to determine which  
496 groups differed significantly [63]. Benjamini-Hochberg (BH) correction was used to adjust for  
497 multiple testing [64].

498

## 499 **Acknowledgements**

500 The authors gratefully acknowledge the help of all SACEMA students and researchers,  
501 specifically the fruitful conversations and helpful comments on the manuscript by Prof. Alex  
502 Welte, Mrs Cari van Schalkwyk, Dr Florian Marx, Prof. Juliet Pulliam and Dr Larisse Bolton. We  
503 would also like to acknowledge Mrs Marisa Honey and Mrs Susan Lotz from the Stellenbosch  
504 writing lab, who copy-edited a first version of the manuscript.

505

## 506 **References**

- 507 [1] Bobashev GV, Morris RJ. Uncertainty and inference in agent-based models. In: 2010  
508 Second International Conference on Advances in System Simulation. IEEE; 2010. p. 67–71.
- 509 [2] Briggs AH, Weinstein MC, Fenwick EA, Karnon J, Sculpher MJ, Paltiel AD. Model  
510 parameter estimation and uncertainty analysis: a report of the ISPOR-SMDM Modeling Good

511 Research Practices Task Force Working Group–6. Medical decision making. 2012;32(5):722–  
512 732.

513 [3] Willem L, Verelst F, Bilcke J, Hens N, Beutels P. Lessons from a decade of individual-  
514 based models for infectious disease transmission: a systematic review (2006-2015). BMC  
515 infectious diseases. 2017;17(1):612.

516 [4] Hammond RA. Considerations and best practices in agent-based modeling to inform  
517 policy. In: Assessing the use of agent-based models for tobacco regulation. National Academies  
518 Press (US); 2015. .

519 [5] Johnson LF, Geffen N. A comparison of two mathematical modeling frameworks for  
520 evaluating sexually transmitted infection epidemiology. Sexually transmitted diseases.  
521 2016;43(3):139–146.

522 [6] Kennedy MC, O’Hagan A. Bayesian calibration of computer models. Journal of the Royal  
523 Statistical Society: Series B (Statistical Methodology). 2001;63(3):425–464.

524 [7] Egger M, Johnson L, Althaus C, Schoni A, Salanti G, Low N, et al. Developing WHO  
525 guidelines: Time to formally include evidence from mathematical modelling studies.  
526 F1000Research. 2017;6:1584.

527 [8] Menzies NA, Soeteman DI, Pandya A, Kim JJ. Bayesian methods for calibrating health  
528 policy models: a tutorial. Pharmacoeconomics. 2017;35(6):613–624.

529 [9] Stout NK, Knudsen AB, Kong CY, McMahon PM, Gazelle GS. Calibration methods used in  
530 cancer simulation models and suggested reporting guidelines. Pharmacoeconomics.  
531 2009;27(7):533–545.

532 [10] Dahabreh IJ, Chan JA, Earley A, Moorthy D, Avendano EE, Trikalinos TA, et al. A Review of  
533 Validation and Calibration Methods for Health Care Modeling and Simulation. In: Modeling and  
534 Simulation in the Context of Health Technology Assessment: Review of Existing Guidance, Future  
535 Research Needs, and Validity Assessment [Internet]. Agency for Healthcare Research and Quality  
536 (US); 2017.

- 537 [11] Caro JJ, Eddy DM, Kan H, Kaltz C, Patel B, Eldessouki R, et al. Questionnaire to assess  
538 relevance and credibility of modeling studies for informing health care decision making: an  
539 ISPOR-AMCP-NPC Good Practice Task Force report. *Value in health*. 2014;17(2):174–182.
- 540 [12] Abuelezam NN, Rough K, Seage III GR. Individual-based simulation models of HIV  
541 transmission: reporting quality and recommendations. *PloS one*. 2013;8(9):e75624.
- 542 [13] Lintusaari J, Gutmann MU, Dutta R, Kaski S, Corander J. Fundamentals and recent  
543 developments in approximate Bayesian computation. *Systematic biology*. 2017;66(1):e66–e82.
- 544 [14] Hartig F, Calabrese JM, Reineking B, Wiegand T, Huth A. Statistical inference for  
545 stochastic simulation models–theory and application. *Ecology letters*. 2011;14(8):816–827.
- 546 [15] Busetto AG, Buhmann JM. Stable Bayesian parameter estimation for biological dynamical  
547 systems. In: 2009 International Conference on Computational Science and Engineering. vol. 1.  
548 IEEE; 2009. p. 148–157.
- 549 [16] Leombruni R, Richiardi M. Why are economists sceptical about agent-based simulations?  
550 *Physica A: Statistical Mechanics and its Applications*. 2005;355(1):103–109.
- 551 [17] Vanni T, Karnon J, Madan J, White RG, Edmunds WJ, Foss AM, et al. Calibrating models in  
552 economic evaluation. *Pharmacoeconomics*. 2011;29(1):35–49.
- 553 [18] Sun NZ, Sun A. Model calibration and parameter estimation: for environmental and  
554 water resource systems. Springer; 2015.
- 555 [19] Bellman R. Dynamic programming. Princeton, USA: Princeton University Press.  
556 1957;1(2):3.
- 557 [20] Nelder JA, Mead R. A simplex method for function minimization. *The computer journal*.  
558 1965;7(4):308–313.
- 559 [21] Amaran S, Sahinidis NV, Sharda B, Bury SJ. Simulation optimization: a review of  
560 algorithms and applications. *Annals of Operations Research*. 2016;240(1):351–380.



- 561 [22] Joshi M, Seidel-Morgenstern A, Kremling A. Exploiting the bootstrap method for  
562 quantifying parameter confidence intervals in dynamical systems. *Metabolic engineering*.  
563 2006;8(5):447–455.
- 564 [23] Stryhn H, Christensen J. Confidence intervals by the profile likelihood method, with  
565 applications in veterinary epidemiology. In: *Proceedings of the 10th International Symposium*  
566 *on Veterinary Epidemiology and Economics, Vina del Mar; 2003*. p. 208.
- 567 [24] McKinley TJ, Vernon I, Andrianakis I, McCreesh N, Oakley JE, Nsubuga RN, et al.  
568 Approximate Bayesian Computation and simulation-based inference for complex stochastic  
569 epidemic models. *Statistical science*. 2018;33(1):4–18.
- 570 [25] Rubin DB. Using the SIR algorithm to simulate posterior distributions. *Bayesian Stat*.  
571 1988;3:395–402.
- 572 [26] Poole D, Raftery AE. Inference for deterministic simulation models: the Bayesian melding  
573 approach. *Journal of the American Statistical Association*. 2000;95(452):1244–1255.
- 574 [27] Schunn CD, Wallach D, et al. Evaluating goodness-of-fit in comparison of models to data.  
575 *Psychologie der Kognition: Reden and vorträge anlässlich der emeritierung von Werner Tack*.  
576 2005;p. 115–154.
- 577 [28] Conrads-Frank A, Jahn B, Bundo M, Sroczynski G, Mühlberger N, Bicher M, et al. A  
578 Systematic Review Of Calibration In Population Models. *Value in Health*. 2017;20(9):A745.
- 579 [29] Afzali HHA, Gray J, Karnon J. Model performance evaluation (validation and calibration)  
580 in model-based studies of therapeutic interventions for cardiovascular diseases. *Applied health*  
581 *economics and health policy*. 2013;11(2):85–93.
- 582 [30] Furuse Y. Analysis of research intensity on infectious disease by disease burden reveals  
583 which infectious diseases are neglected by researchers. *Proceedings of the National Academy of*  
584 *Sciences*. 2019;116(2):478–483.

- 585 [31] McCreesh N, Andrianakis I, Nsubuga RN, Strong M, Vernon I, McKinley T], et al. Universal  
586 test, treat, and keep: improving ART retention is key in cost-effective HIV control in Uganda.  
587 BMC infectious diseases. 2017;17(1):322.
- 588 [32] Kessler J, Nucifora K, Li L, Uhler L, Braithwaite S. Impact and Cost-Effectiveness of  
589 Hypothetical Strategies to Enhance Retention in Care within HIV Treatment Programs in East  
590 Africa. Value in health : the journal of the International Society for Pharmacoeconomics and  
591 Outcomes Research. 2015 dec;18(8):946–955. Available from: [http://linkinghub.elsevier.com/-](http://linkinghub.elsevier.com/retrieve/pii/S1098301515050731)  
592 [retrieve/pii/S1098301515050731](http://linkinghub.elsevier.com/retrieve/pii/S1098301515050731).
- 593 [33] Klein DJ, Eckhoff PA, Bershteyn A. Targeting HIV services to male migrant workers in  
594 southern Africa would not reverse generalized HIV epidemics in their home communities: A  
595 mathematical modeling analysis. International Health. 2015 mar;7(2):107–113.
- 596 [34] Walensky RP, Borre ED, Bekker LG, Resch SC, Hyle EP, Wood R, et al. The Anticipated  
597 Clinical and Economic Impact of 90-90-90 in South Africa. Annals of internal medicine.  
598 2016;165(5):325–333. Available from: [https://www.ncbi.nlm.nih.gov/pmc/articles/-](https://www.ncbi.nlm.nih.gov/pmc/articles/PMC5012932/pdf/nihms784208.pdf)  
599 [PMC5012932/pdf/nihms784208.pdf](https://www.ncbi.nlm.nih.gov/pmc/articles/PMC5012932/pdf/nihms784208.pdf).
- 600 [35] Bershteyn A, Klein DJ, Eckhoff PA. Age-dependent partnering and the HIV transmission  
601 chain: a microsimulation analysis. Journal of the Royal Society, Interface. 2013  
602 nov;10(88):20130613. Available from: [http://rsif.royalsocietypublishing.org/cgi/doi/10.1098/-](http://rsif.royalsocietypublishing.org/cgi/doi/10.1098/rsif.2013.0613)  
603 [rsif.2013.0613](http://rsif.royalsocietypublishing.org/cgi/doi/10.1098/rsif.2013.0613).
- 604 [36] McCormick AW, Abuelezam NN, Rhode ER, Hou T, Walensky RP, Pei PP, et al.  
605 Development, calibration and performance of an HIV transmission model incorporating natural  
606 history and behavioral patterns: application in South Africa. PloS one. 2014 may;9(5):e98272.  
607 Available from: <http://dx.plos.org/10.1371/journal.pone.0098272>.
- 608 [37] Johnson LF, Kubjane M, Moolla H. MicroCOSM: a model of social and structural drivers of  
609 HIV and interventions to reduce HIV incidence in high-risk populations in South Africa. bioRxiv.  
610 2018;p. 310763.

- 611 [38] Gopalappa C, Farnham PG, Chen YH, Sansom SL. Progression and Transmission of  
612 HIV/AIDS (PATH 2.0). *Medical decision making : an international journal of the Society for*  
613 *Medical Decision Making*. 2017 feb;37(2):224–233.
- 614 [39] Bakker R, Korenromp E, Meester E, Van Der Ploeg C, Voeten H, Van Vliet C, et al. Stdsim:  
615 A microsimulation model for decision support in the control of hiv and other stds. *Sexually*  
616 *Transmitted Diseases*. 2000;27(10):652.
- 617 [40] Marshall\_Labs. Treatment of infectious transmissions through agent-based network.  
618 2017; Available from: <https://titan-documentation.readthedocs.io/en/latest/index.html>.
- 619 [41] Bershteyn A, Gerardin J, Bridenbecker D, Lorton CW, Bloedow J, Baker RS, et al.  
620 Implementation and applications of EMOD, an individual-based multi-disease modeling  
621 platform. *Pathogens and disease*. 2018;76(5):fty059.
- 622 [42] Penny MA, Galactionova K, Tarantino M, Tanner M, Smith TA. The public health impact of  
623 malaria vaccine RTS,S in malaria endemic Africa: Country-specific predictions using 18 month  
624 follow-up Phase III data and simulation models. *BMC Medicine*. 2015 jul;13(1):170.
- 625 [43] Chang ST, Chihota VN, Fielding KL, Grant AD, Houben RM, White RG, et al. Small  
626 contribution of gold mines to the ongoing tuberculosis epidemic in South Africa: a modeling-  
627 based study. *BMC medicine*. 2018 apr;16(1):52.
- 628 [44] Fojo AT, Kendall EA, Kasaie P, Shrestha S, Louis TA, Dowdy DW. Mathematical Modeling  
629 of “Chronic” Infectious Diseases: Unpacking the Black Box. In: *Open forum infectious diseases*.  
630 vol. 4. Oxford University Press US; 2017. p. ofx172.
- 631 [45] Gilbert JA, Meyers LA, Galvani AP, Townsend JP. Probabilistic uncertainty analysis of  
632 epidemiological modeling to guide public health intervention policy. *Epidemics*. 2014;6:37–45.
- 633 [46] Caro JJ, Briggs AH, Siebert U, Kuntz KM. Modeling good research practices—overview: a  
634 report of the ISPOR-SMDM Modeling Good Research Practices Task Force–1. *Medical Decision*  
635 *Making*. 2012;32(5):667–677.

- 636 [47] Fehr J, Heiland J, Himpe C, Saak J. Best practices for replicability, reproducibility and  
637 reusability of computer-based experiments exemplified by model reduction software. arXiv  
638 preprint arXiv:160701191. 2016;.
- 639 [48] Taylor DC, Pawar V, Kruzikas D, Gilmore KE, Pandya A, Iskandar R, et al. Methods of  
640 model calibration. *Pharmacoeconomics*. 2010;28(11):995–1000.
- 641 [49] Gerberry DJ. An exact approach to calibrating infectious disease models to surveillance  
642 data: The case of HIV and HSV-2. *Mathematical Biosciences & Engineering*. 2018;15(1):153–179.
- 643 [50] Hodges JS. Six (or so) things you can do with a bad model. *Operations Research*.  
644 1991;39(3):355–365.
- 645 [51] Kenyon CR, Delva W, Brotman RM. Differential sexual network connectivity offers a  
646 parsimonious explanation for population-level variations in the prevalence of bacterial  
647 vaginosis: a data-driven, model-supported hypothesis. *BMC women's health*. 2019;19(1):8.
- 648 [52] Delva W, Leventhal GE, Helleringer S. Connecting the dots: network data and models in  
649 HIV epidemiology. *Aids*. 2016;30(13):2009–2020.
- 650 [53] Karnon J, Vanni T. Calibrating models in economic evaluation. *Pharmacoeconomics*.  
651 2011;29(1):51–62.
- 652 [54] Kopec JA, Finès P, Manuel DG, Buckeridge DL, Flanagan WM, Oderkirk J, et al. Validation  
653 of population-based disease simulation models: a review of concepts and methods. *BMC public  
654 health*. 2010;10(1):710.
- 655 [55] Talts S, Betancourt M, Simpson D, Vehtari A, Gelman A. Validating Bayesian inference  
656 algorithms with simulation-based calibration. arXiv preprint arXiv:180406788. 2018;.
- 657 [56] Srikrishnan V, Keller K. How much data are needed to calibrate and test agent-based  
658 models? arXiv preprint arXiv:181108524. 2018;.
- 659 [57] Zhang H, Vorobeychik Y. Empirically grounded agent-based models of innovation  
660 diffusion: a critical review. *Artificial Intelligence Review*. 2019;p. 1–35.

- 661 [58] Murray EJ, Robins JM, Seage III GR, Lodi S, Hyle EP, Reddy KP, et al. Using observational  
662 data to calibrate simulation models. *Medical Decision Making*. 2018;38(2):212–224.
- 663 [59] Lee JS, Filatova T, Ligmann-Zielinska A, Hassani-Mahmooei B, Stonedahl F, Lorscheid I,  
664 et al. The complexities of agent-based modeling output analysis. *Journal of Artificial Societies  
665 and Social Simulation*. 2015;18(4):4.
- 666 [60] Punyacharoensin N, Edmunds WJ, De Angelis D, White RG. Mathematical models for the  
667 study of HIV spread and control amongst men who have sex with men. *European journal of  
668 epidemiology*. 2011;26(9):695.
- 669 [61] Moher D, Liberati A, Tetzlaff J, Altman DG. Preferred reporting items for systematic  
670 reviews and meta-analyses: the PRISMA statement. *Annals of internal medicine*.  
671 2009;151(4):264–269.
- 672 [62] R Core Team. *R: A Language and Environment for Statistical Computing*. Vienna, Austria;  
673 2018. Available from: <https://www.R-project.org/>.
- 674 [63] Holland M, Wolfe D. *Nonparametric statistical methods*. John Wiley & Sons, New York;  
675 1973.
- 676 [64] Benjamini Y, Hochberg Y. Controlling the false discovery rate: a practical and powerful  
677 approach to multiple testing. *Journal of the Royal statistical society: series B (Methodological)*.  
678 1995;57(1):289–300.
- 679

680 **Supporting information captions**

681 **S1 Table. Articles included for review**

682 **S2 Table. Description of calibration algorithms**

683 **S1 Text. Obtaining parameter uncertainty using an optimisation algorithm, quoted**  
684 **from Sauboin et al.**

685 **S2 Text. Selected quotes of rationales for choosing model calibration method**

686 **S1 Appendix. Parameter search strategies by disease and year of publication**

687 **S2 Appendix. Histograms and plots for counts of targets, calibrated parameters**  
688 **and the size of the simulated population**

689 **S3 Appendix. Calibration reporting checklist**

690
